# Supplementary material for: Nutritional Quality of Gluten-Free Bakery Products Labeled Ketogenic and/or Low-Carb Sold in the Global Market
Source: MDPI journal article supplement (doi:10.3390/foods11244095), 2022-12-18
Supplement: s1 [file s1]

**Table S1:** List of ingredients of baking flour mixes

| <b>Ingredients</b> | <b>K-LC</b>                                                                                                                                                                  | <b>K</b>                                                                                                                                                      | <b>LC</b>                                                                                                                                                                                                                                   | <b>STD</b>                                                                                                                                                                                       |
|--------------------|------------------------------------------------------------------------------------------------------------------------------------------------------------------------------|---------------------------------------------------------------------------------------------------------------------------------------------------------------|---------------------------------------------------------------------------------------------------------------------------------------------------------------------------------------------------------------------------------------------|--------------------------------------------------------------------------------------------------------------------------------------------------------------------------------------------------|
| <b>Flours</b>      | Almond flour coconut flour<br>cassava flour lupin flour brown<br>rice, linseed flour chickpea flour                                                                          | Almond flour, coconut flour,<br>cocoa powder, linseed flour, tiger<br>nut flour, cassava flour chickpea<br>flour, brown rice flour lupin<br>flour, rice flour | Rice flour cocoa powder corn<br>flours cassava flour brown rice<br>flour almond flour oat flour<br>almond soybean flour coconut<br>flour, millet flour, coconut<br>flour, chickpea flour, sorghum<br>flour, navy bean flour, lupin<br>flour | Cassava flour almond flour<br>coconut flour cocoa powder brown<br>rice flour amaranth flour white<br>rice flour oat flour chickpea flour<br>corn flours sorghum flour potato<br>flour rice flour |
| <b>Fibers</b>      | Xanthan gum psyllium seed<br>husks soluble corn fibre, inulin,<br>cassava fibre oat fibre sugar cane<br>fiber resistant dextrin guar gum<br>pea fibre apple fiber, cellulose | Xanthan gum inulin psyllium<br>seed husks cassava fibre soluble<br>corn fibre oat fibre sugar cane<br>fiber guar gum<br>Resistant dextrin                     | Psyllium seed husks xanthan<br>gum guar gum inulin citrus<br>fibre, resistant starch, oat fiber,<br>pea fiber                                                                                                                               | Guar gum psyllium seed husks<br>inulin cassava fibre carrageenan                                                                                                                                 |
| <b>Sugars</b>      | -                                                                                                                                                                            | Cane sugar, oligosaccharides                                                                                                                                  | White sugar cane sugar, brown<br>sugar, glucose, resistant<br>maltodextrin, polydextrose                                                                                                                                                    | Cane sugar, coconut palm sugar<br>brown sugar glucose maltodextrin                                                                                                                               |
| <b>Starches</b>    | Cassava starch corn starch pea<br>starch                                                                                                                                     | Cassava starch corn starch potato<br>starch                                                                                                                   | Corn starch potato starch<br>cassava starch rice starch                                                                                                                                                                                     | Potato starch modified corn starch<br>modified cassava starch                                                                                                                                    |
| <b>Fats</b>        | Coconut oil, sunflower oil, palm<br>oil                                                                                                                                      | Cocoa fat, sunflower seed oil -<br>high oleic acid coconut oil palm<br>oil<br>Low erucic acid rapeseed oil,<br>skimmed milk powder                            | Sunflower seed oil palm oil<br>coconut oil butter sunflower<br>seed oil safflower seed oil,<br>cocoa fat                                                                                                                                    | Palm oil palm kernel oil skimmed<br>milk powder mono- and di-<br>glycerides of fatty acids low erucic<br>acid rapeseed oil milk fats                                                             |
| <b>Proteins</b>    | Dried eggs, pea protein, whey<br>protein concentrates, milk<br>protein isolate rice protein                                                                                  | Eggs whey protein concentrate<br>pea protein<br>Egg whites                                                                                                    | Eggs, pea protein, whey<br>protein, cereal gluten                                                                                                                                                                                           | Egg whites                                                                                                                                                                                       |
| <b>Sweeteners</b>  | Erythritol xylitol allulose steviol<br>glycoside, stevia, maltitol,<br>sucralose                                                                                             | Erythritol stevia steviol glycoside<br>extract xylitol allulose                                                                                               | Erythritol, stevia, xylitol,<br>allulose, sucralose, steviol<br>glycoside                                                                                                                                                                   | Allulose                                                                                                                                                                                         |
| <b>Sodium</b>      |                                                                                                                                                                              | Sodium hydrogen carbonate, salt                                                                                                                               | Sea salt sodium hydrogen<br>carbonate                                                                                                                                                                                                       | Iodized salt                                                                                                                                                                                     |

**Table S2:** List of ingredients of bread products

| <b>Ingredients</b> | <b>K-LC</b>                                                                                            | <b>K</b>                                                                                                                                                                                                                     | <b>LC</b>                                                                                          | <b>STD</b>                                                                                                                                                                                                                                                                       |
|--------------------|--------------------------------------------------------------------------------------------------------|------------------------------------------------------------------------------------------------------------------------------------------------------------------------------------------------------------------------------|----------------------------------------------------------------------------------------------------|----------------------------------------------------------------------------------------------------------------------------------------------------------------------------------------------------------------------------------------------------------------------------------|
| <b>Flours</b>      | Almond flour coconut flour<br>konjac flour cassava flour<br>hazelnut flour coconut palm<br>sugar       | Coconut flour almond flour<br>linseed chia seed cassava flour<br>arrowroot flour konjac flour<br>almond                                                                                                                      | Coconut flour almond flour<br>cornflours cassava flour soybean<br>amaranth sweet potato flour      | Rice flour cocoa powder<br>cornflours cassava flour brown<br>rice flour almond flour oat flour<br>almond quinoa soybean flour<br>coconut flour, millet flour brown<br>rice flour soybean flour                                                                                   |
| <b>Fibers</b>      | Psyllium seed husks, inulin,<br>bamboo fibre guar gum rice bran<br>wheat fibre citrus fibre, cellulose | Psyllium seed husks xanthan<br>gum guar gum inulin carob bean<br>gum bamboo fibre rice bran                                                                                                                                  | Psyllium seed husks xanthan<br>gum inulin powdered cellulose<br>bamboo fibre rice bran oat fibre   | Psyllium seed husks xanthan<br>gum guar gum inulin citrus fibre                                                                                                                                                                                                                  |
| <b>Sugars</b>      |                                                                                                        | Maple syrup                                                                                                                                                                                                                  | Glycerol                                                                                           | White sugar cane sugar, brown<br>sugar, glucose glycerol rice syrup<br>agave syrup                                                                                                                                                                                               |
| <b>Starches</b>    | Cassava starch, resistant tapioca<br>starch corn starch                                                | Corn starch modified cassava<br>starch (food) resistant tapioca<br>starch potato starch                                                                                                                                      | Potato starch cassava starch<br>resistant tapioca starch corn<br>starch                            | Corn starch potato starch cassava<br>starch rice starch                                                                                                                                                                                                                          |
| <b>Fats</b>        | Coconut oil, mozzarella cheese,<br>sunflower seed oil olive oil<br>sunflower fat                       | Coconut oil sunflower seed oil<br>coconut oil avocado oil cream<br>cheese almond butter, cream<br>coconut mozzarella cheese milk<br>poppy seed palm oil sesame seed<br>coconut cream olive oil cheddar<br>cheese butter ghee | Coconut oil mozzarella cheese<br>full fat milk sunflower seed olive<br>oil skim milk almond butter | Sunflower seed oil palm oil<br>coconut oil butter sunflower seed<br>oil milk rapeseed oil palm fat<br>mono- and di-glycerides of fatty<br>acids black sesame seed,<br>margarine, cheese and cheese<br>products linseed chia seed, olive<br>oil full fat milk safflower seed oil, |
| <b>Proteins</b>    | Egg whites, pumpkin seed<br>protein hemp protein                                                       | Egg whites eggs pumpkin seed<br>protein hemp protein soybean<br>proteins                                                                                                                                                     | Egg whites isolated soy protein<br>pumpkin seed protein                                            | Eggs, soybean protein, pea<br>protein                                                                                                                                                                                                                                            |
| <b>Sweeteners</b>  |                                                                                                        |                                                                                                                                                                                                                              |                                                                                                    |                                                                                                                                                                                                                                                                                  |
| <b>Sodium</b>      | Sodium hydrogen carbonate                                                                              | Sodium hydrogen carbonate                                                                                                                                                                                                    | Sodium hydrogen carbonate sea<br>salt                                                              | Sea salt sodium hydrogen<br>carbonate                                                                                                                                                                                                                                            |

**Table S3:** List of ingredients of cakes, pastries, and sweet goods

| <b>Ingredients</b> | <b>K-LC</b>                                                                                                                                                                                                     | <b>K</b>                                                                                                                                                                                                                                                         | <b>LC</b>                                                                                                                             | <b>STD</b>                                                                                                                                                                                                                                                                                                                                     |
|--------------------|-----------------------------------------------------------------------------------------------------------------------------------------------------------------------------------------------------------------|------------------------------------------------------------------------------------------------------------------------------------------------------------------------------------------------------------------------------------------------------------------|---------------------------------------------------------------------------------------------------------------------------------------|------------------------------------------------------------------------------------------------------------------------------------------------------------------------------------------------------------------------------------------------------------------------------------------------------------------------------------------------|
| <b>Flours</b>      | Almond flour coconut flour<br>cassava flour lupin flour brown<br>rice, linseed flour, oat flour lupin<br>flour                                                                                                  | Almond flour coconut flour lupin<br>flour, peanut flour, chia flour cassava<br>flour cocoa powder linseed flour,<br>cashew nut flour, arrowroot flour<br>(food), soybean flour sunseed flour                                                                     | Almond flour soybean<br>flour coconut flour                                                                                           | Rice flour cocoa powder corn flours<br>cassava flour brown rice flour almond<br>flour oat flour almond soybean flour<br>coconut flour, millet flour brown rice<br>flour cocoa powder sorghum flour<br>konjac flour bean flour                                                                                                                  |
| <b>Fibers</b>      | Xanthan gum psyllium seed<br>husks soluble corn fibre, inulin,<br>cassava fibre oat fibre sugar cane<br>fiber guar gum powdered<br>cellulose bamboo fibre                                                       | Xanthan gum inulin gum arabic, guar<br>gum soluble corn fibre, cassava fibre,<br>psyllium seed husks, powdered<br>cellulose, bamboo fibre                                                                                                                        | Xanthan gum soluble<br>corn fibre powdered<br>cellulose inulin, guar<br>gum bamboo fibre,<br>psyllium seed husks                      | Psyllium seed husks xanthan gum<br>guar gum inulin citrus fibre                                                                                                                                                                                                                                                                                |
| <b>Sugars</b>      | Corn maltodextrin glycerol<br>glucose                                                                                                                                                                           | Glycerol polydextrose cocoa liquor,<br>oligosaccharides white sugar glucose,<br>date, coconut palm sugar, glycerol,                                                                                                                                              | Glycerol                                                                                                                              | White sugar cane sugar, brown sugar,<br>glucose glycerol rice syrup agave<br>syrup invert sugars maltodextrin                                                                                                                                                                                                                                  |
| <b>Starches</b>    | Cassava starch corn starch pea<br>starch potato starch rice starch                                                                                                                                              | Cassava starch corn starch                                                                                                                                                                                                                                       | Cassava starch                                                                                                                        | Corn starch potato starch cassava<br>starch rice starch                                                                                                                                                                                                                                                                                        |
| <b>Fats</b>        | Coconut oil, sunflower oil, palm<br>oil, olive oil, milk, rice bran oil,<br>butter, coconut cream, full fat<br>milk, butter cocoa fat, palm oil,<br>peanut butter, cream coconut<br>milk butter hazelnut butter | Coconut oil butter cocoa fat palm oil<br>almond butter, cream, peanut butter<br>full fat milk, medium chain<br>triglycerides, milk palm kernel oil<br>avocado oil butter ghee egg yolks,<br>sunflower oil salted butter almond<br>butter skim milk peanut butter | Palm kernel oil coconut<br>oil palm oil cocoa fat<br>sunflower seed oil,<br>butter, peanut butter,<br>olive oil, milk rapeseed<br>oil | Sunflower seed oil palm oil coconut<br>oil butter sunflower seed oil milk<br>rapeseed oil palm fat mono- and di-<br>glycerides of fatty acids black sesame<br>seed, margarine, cheese and cheese<br>products linseed chia seed, olive oil<br>full fat milk safflower seed oil, cocoa<br>fat butter milk sweetened condensed<br>milk butter fat |
| <b>Proteins</b>    | Eggs isolated soy protein casein<br>milk protein concentrate                                                                                                                                                    | Eggs egg whites, pea protein<br>hydrolyzed collagen dried eggs,<br>casein soy protein concentrates                                                                                                                                                               | Eggs whey protein<br>isolate hydrolyzed<br>collagen casein, milk<br>protein                                                           | Eggs, spirulina extract                                                                                                                                                                                                                                                                                                                        |
| <b>Sweeteners</b>  | Erythritol, xylitol allulose steviol<br>glycoside, stevia, maltitol,<br>sucralose                                                                                                                               | Erythritol stevia extract steviol<br>glycoside allulose xylitol stevioside<br>sucralose                                                                                                                                                                          | Erythritol stevia<br>sucralose, allulose,<br>xylitol                                                                                  | Sorbitol                                                                                                                                                                                                                                                                                                                                       |
| <b>Sodium</b>      | Rock salt sodium hydrogen<br>carbonate                                                                                                                                                                          | Sodium hydrogen carbonate salt                                                                                                                                                                                                                                   | Sodium hydrogen<br>carbonate                                                                                                          | Sea salt sodium hydrogen carbonate                                                                                                                                                                                                                                                                                                             |

**Table S4:** List of ingredients of savory biscuits and crackers

| <b>Ingredients</b> | <b>K-LC</b>                                                                                                                                                                  | <b>K</b>                                                                                                                                                                                                                                                                                   | <b>LC</b>                                                                                                                                                                                                   | <b>STD</b>                                                                                                                                                                                                                                                                                               |
|--------------------|------------------------------------------------------------------------------------------------------------------------------------------------------------------------------|--------------------------------------------------------------------------------------------------------------------------------------------------------------------------------------------------------------------------------------------------------------------------------------------|-------------------------------------------------------------------------------------------------------------------------------------------------------------------------------------------------------------|----------------------------------------------------------------------------------------------------------------------------------------------------------------------------------------------------------------------------------------------------------------------------------------------------------|
| <b>Flours</b>      | Almond flour coconut flour<br>cassava flour lupin flour brown<br>rice, linseed flour chickpea flour,<br>soybean flour                                                        | Coconut flour almond flour<br>linseed chia seed cassava flour<br>arrowroot flour konjac flour<br>almond, soy flour, lupin flour,<br>brown rice flour                                                                                                                                       | Almond coconut flour brown rice<br>flour linseed flour rice flour<br>soybean flour oat flour cassava<br>flour chickpea flour lupin flour<br>quinoa flour                                                    | Rice flour cocoa powder<br>cornflours cassava flour brown<br>rice flour almond flour oat flour<br>almond quinoa soybean flour<br>arrowroot flour buckwheat flour<br>coconut flour, millet flour                                                                                                          |
| <b>Fibers</b>      | Xanthan gum psyllium seed<br>husks soluble corn fibre, inulin,<br>cassava fibre oat fibre sugar cane<br>fiber resistant dextrin guar gum<br>pea fibre apple fiber, cellulose | Psyllium seed husks xanthan<br>gum guar gum inulin carob bean<br>gum bamboo fibre rice bran                                                                                                                                                                                                | Xanthan gum inulin guar gum<br>cassava fibre                                                                                                                                                                | Xanthan gum guar gum inulin                                                                                                                                                                                                                                                                              |
| <b>Sugars</b>      | Corn maltodextrin                                                                                                                                                            | Maple syrup                                                                                                                                                                                                                                                                                | White sugar polydextrose fructo-<br>oligosaccharides                                                                                                                                                        | White sugar cane sugar m<br>coconut palm sugar brown sugar                                                                                                                                                                                                                                               |
| <b>Starches</b>    | Cassava starch corn starch pea<br>starch potato starch                                                                                                                       | Corn starch modified cassava<br>starch (food) resistant tapioca<br>starch potato starch, cassava<br>starch potato starch                                                                                                                                                                   | Corn starch cassava starch<br>resistant tapioca starch potato<br>starch                                                                                                                                     | Corn starch potato starch cassava<br>starch rice starch                                                                                                                                                                                                                                                  |
| <b>Fats</b>        | Coconut oil, sunflower oil, palm<br>oil, olive oil, milk, rice bran oil,<br>butter, coconut cream, cheese,<br>full fat milk                                                  | Coconut oil sunflower seed oil<br>coconut oil avocado oil cream<br>cheese almond butter, cream<br>coconut mozzarella cheese milk<br>poppy seed palm oil sesame seed<br>coconut cream olive oil cheddar<br>cheese butter ghee, rice bran oil,<br>milk, butter, coconut cream<br>butter milk | Butter cocoa fat coconut oil palm<br>oil milk mono- and di-glycerides<br>of fatty acids, butter palm kernel<br>oil skimmed milk powder<br>soybean oil milk solids rice bran<br>oil butter milk cream cheese | Cocoa fat sunflower seed oil<br>palm oil coconut oil butter<br>sunflower seed oil milk rapeseed<br>oil palm fat mono- and di-<br>glycerides of fatty acids skimmed<br>milk powder, black sesame seed,<br>margarine, cheese and cheese<br>products linseed chia seed poppy<br>seed pumpkin seed olive oil |
| <b>Proteins</b>    | Dried eggs whey protein<br>concentrate milk protein, hemp<br>protein, algae                                                                                                  | Egg whites eggs pumpkin seed<br>protein hemp protein soybean<br>proteins, algae                                                                                                                                                                                                            | Eggs egg soy protein isolates<br>whey protein concentrate                                                                                                                                                   | Eggs                                                                                                                                                                                                                                                                                                     |
| <b>Sweeteners</b>  | Erythritol xylitol allulose steviol<br>glycoside, stevia, maltitol,<br>sucralose                                                                                             | Annatto stevia extract                                                                                                                                                                                                                                                                     |                                                                                                                                                                                                             |                                                                                                                                                                                                                                                                                                          |
| <b>Sodium</b>      | Sodium hydrogen carbonate salt                                                                                                                                               | Sodium hydrogen carbonate                                                                                                                                                                                                                                                                  | Sodium hydrogen carbonate salt                                                                                                                                                                              | Sea salt sodium hydrogen<br>carbonate                                                                                                                                                                                                                                                                    |

**Table S5:** List of ingredients of sweet biscuits and cookies

| Ingredients       | K-LC                                                                                                                                                                     | K                                                                                                                                                                                                                          | LC                                                                                                                                                                                          | STD                                                                                                                                                                               |
|-------------------|--------------------------------------------------------------------------------------------------------------------------------------------------------------------------|----------------------------------------------------------------------------------------------------------------------------------------------------------------------------------------------------------------------------|---------------------------------------------------------------------------------------------------------------------------------------------------------------------------------------------|-----------------------------------------------------------------------------------------------------------------------------------------------------------------------------------|
| <b>Flours</b>     | Almond flour coconut flour<br>cassava flour lupin flour brown<br>rice, linseed flour , oat flour                                                                         | Almond flour coconut flour lupin<br>flour, peanut flour, chia flour<br>cassava flour cocoa powder<br>linseed flour,, cashew nut flour,<br>arrowroot flour (food)                                                           | Almond coconut flour brown rice<br>flour linseed flour rice flour<br>soybean flour oat flour cassava<br>flour                                                                               | Rice flour cocoa powder<br>cornflours cassava flour brown<br>rice flour almond flour oat flour<br>almond quinoa soybean flour<br>arrowroot flour buckwheat flour<br>coconut flour |
| <b>Fibers</b>     | Xanthan gum psyllium seed<br>husks soluble corn fibre, inulin,<br>cassava fibre oat fibre sugar cane<br>fiber guar gum                                                   | Xanthan gum inulin gum arabic,<br>guar gum soluble corn fibre,<br>cassava fibre, psyllium seed<br>husks                                                                                                                    | Xanthan gum inulin guar gum<br>cassava fibre psyllium seed<br>husks                                                                                                                         | Xanthan gum guar gum inulin                                                                                                                                                       |
| <b>Sugars</b>     | Corn maltodextrin glycerol<br>glucose                                                                                                                                    | Glycerol polydextrose cocoa<br>liquor, oligosaccharides white<br>sugar glucose, date, coconut<br>palm sugar                                                                                                                | Glycerol white sugar<br>polydextrose fructo-<br>oligosaccharides                                                                                                                            | White sugar cane sugar<br>maltodextrin coconut palm sugar<br>brown sugar glucose syrup<br>tapioca syrup polydextrose<br>caramel i plain                                           |
| <b>Starches</b>   | Cassava starch corn starch pea<br>starch potato starch                                                                                                                   | Cassava starch                                                                                                                                                                                                             | Corn starch cassava starch                                                                                                                                                                  | Corn starch potato starch cassava<br>starch rice starch                                                                                                                           |
| <b>Fats</b>       | Coconut oil, sunflower oil, palm<br>oil, olive oil, milk, rice bran oil,<br>butter, coconut cream, full fat<br>milk, butter cocoa fat, palm oil,<br>peanut butter, cream | Coconut oil butter cocoa fat palm<br>oil almond butter, cream, peanut<br>butter full fat milk, medium<br>chain triglycerides, milk palm<br>kernel oil avocado oil butter ghee<br>egg yolks, sunflower oil salted<br>butter | Butter cocoa fat coconut oil palm<br>oil milk mono- and di-glycerides<br>of fatty acids peanut butter palm<br>kernel oil skimmed milk powder<br>soybean oil milk solids<br>margarine, cream | Cocoa fat sunflower seed oil<br>palm oil coconut oil butter<br>sunflower seed oil milk rapeseed<br>oil palm fat mono- and di-<br>glycerides of fatty acids skimmed<br>milk powder |
| <b>Proteins</b>   | Eggs isolated soy protein                                                                                                                                                | Eggs egg whites, pea protein<br>hydrolyzed collagen dried eggs                                                                                                                                                             | Eggs egg whites isolated soy<br>protein whey protein concentrate<br>milk proteins whey protein<br>isolate                                                                                   | Eggs                                                                                                                                                                              |
| <b>Sweeteners</b> | Erythritol xylitol allulose steviol<br>glycoside, stevia, maltitol,<br>sucralose                                                                                         | Erythritol stevia extract steviol<br>glycoside allulose xylitol<br>stevioside sucralose                                                                                                                                    | Erythritol stevia allulose<br>sucralose maltitol xylitol steviol<br>glycoside sorbitol                                                                                                      | Sorbitols sucralose erythritol<br>stevia                                                                                                                                          |
| <b>Sodium</b>     | Sodium hydrogen carbonate salt                                                                                                                                           | Sodium hydrogen carbonate salt                                                                                                                                                                                             | Sodium hydrogen carbonate salt                                                                                                                                                              | Sea salt sodium hydrogen<br>carbonate                                                                                                                                             |
